# Supplementary material for: Comparison of Prescribing Patterns Before and After Implementation of a National Policy to Reduce Inappropriate Alprazolam Prescribing in Australia
Source: PubMed Central journal article supplement (PMC6751760; doi:10.1001/jamanetworkopen.2019.11590), 2019-09-18
Supplement: jamanetwopen-2-e1911590-s001.pdf [file jamanetwopen-2-e1911590-s001.pdf]

## Supplementary Online Content

Schaffer AL, Buckley NA, Cairns R, Pearson S. Comparison of prescribing patterns before and after implementation of a national policy to reduce inappropriate alprazolam prescribing in Australia. *JAMA Netw Open*. 2019;2(9):e19111590 doi:10.1001/jamanetworkopen.2019.11590

**eFigure 1.** Proportion of All Dispensings by Tablets Dispensed by Month

**eFigure 2.** Proportion of All Dispensings by Total Combined Strength of All Tablets Dispensed by Month

**eFigure 3.** Proportion of All Dispensings by Tablets Dispensed to People Initiating a New Treatment Episode By Quarter

**eFigure 4.** Proportion of All Dispensings by Total Combined Strength of All Tablets Dispensed to People Initiating a New Treatment Episode By Quarter

**eFigure 5.** Dispensing of Benzodiazepines by Month

**eTable 1.** Change in Monthly Dispensings of Benzodiazepines After Changes to Alprazolam Subsidy Estimated Using Autoregressive Models

**eFigure 6.** All Prescribing Approvals Excluding Alprazolam by Month

**eTable 2.** Change in Monthly Total Prescribing Approvals Excluding Alprazolam After Changes To Alprazolam Subsidy Estimated Using Autoregressive Models

This supplementary material has been provided by the authors to give readers additional information about their work.

eFigure 1. Proportion of All Dispensings by Tablets Dispensed by Month

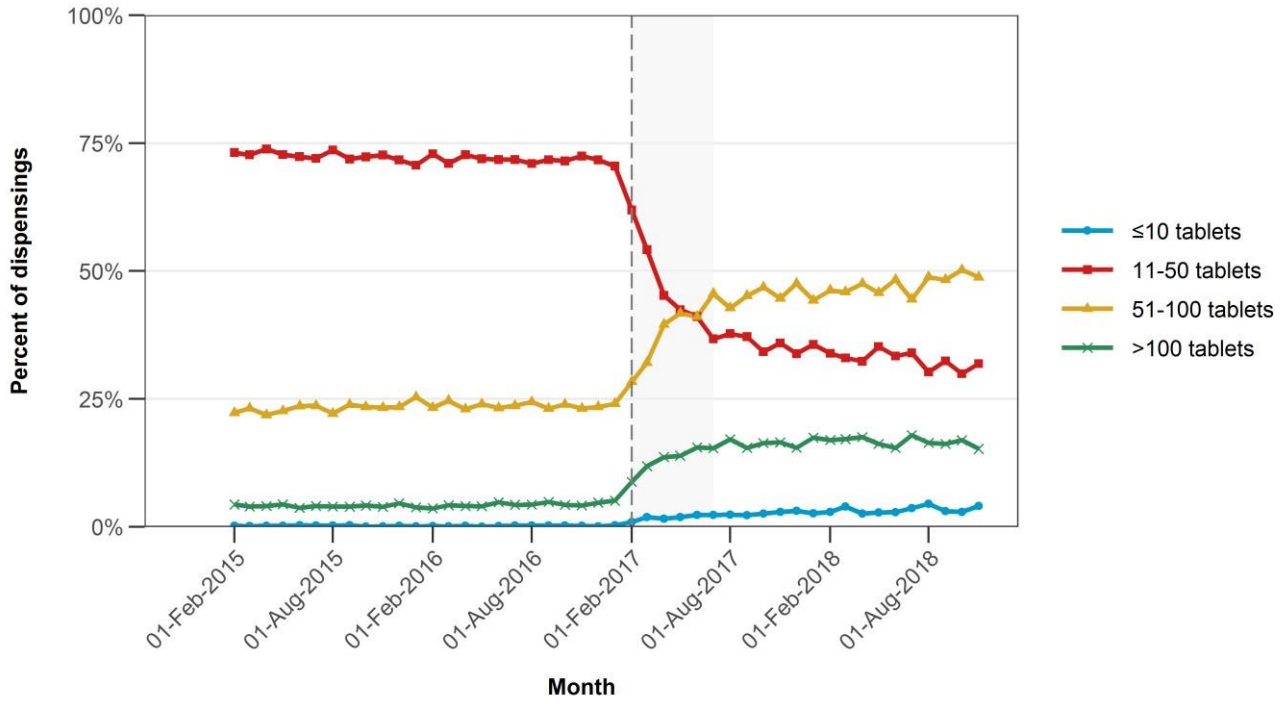

eFigure 2. Proportion of All Dispensings by Total Combined Strength of All Tablets Dispensed by Month

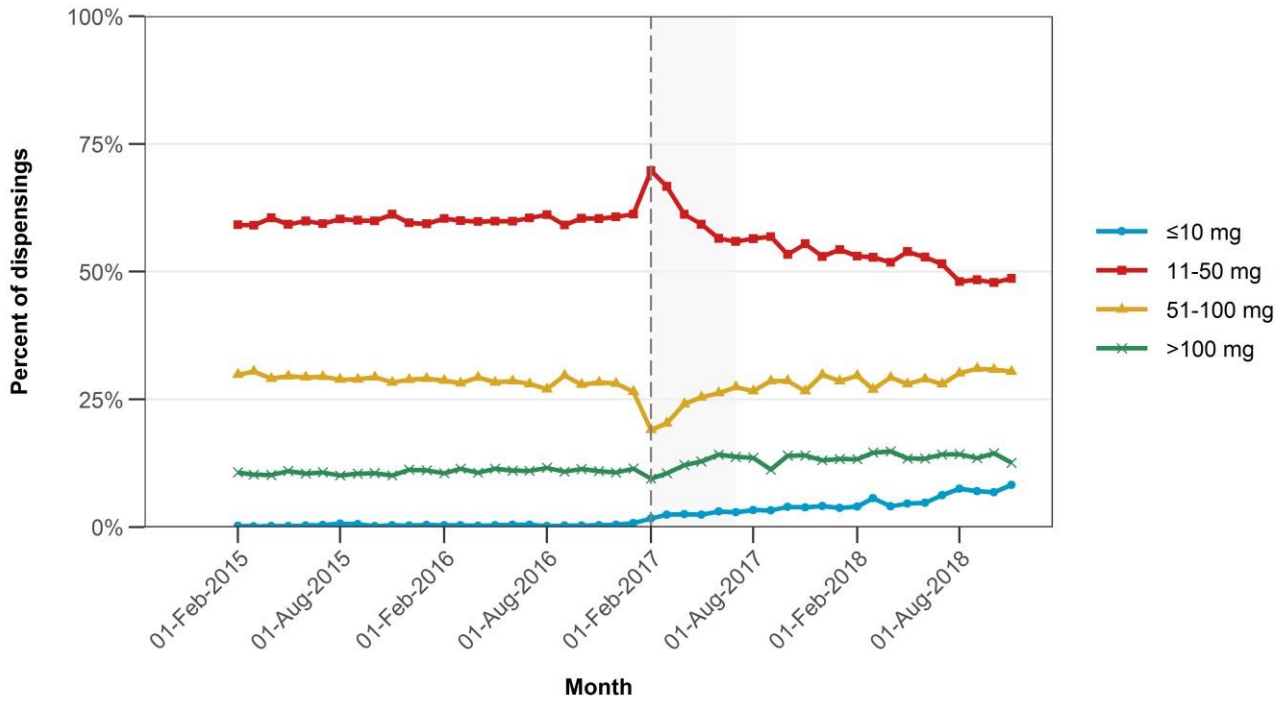

eFigure 3. Proportion of All Dispensings by Tablets Dispensed to People Initiating a New Treatment Episode By Quarter

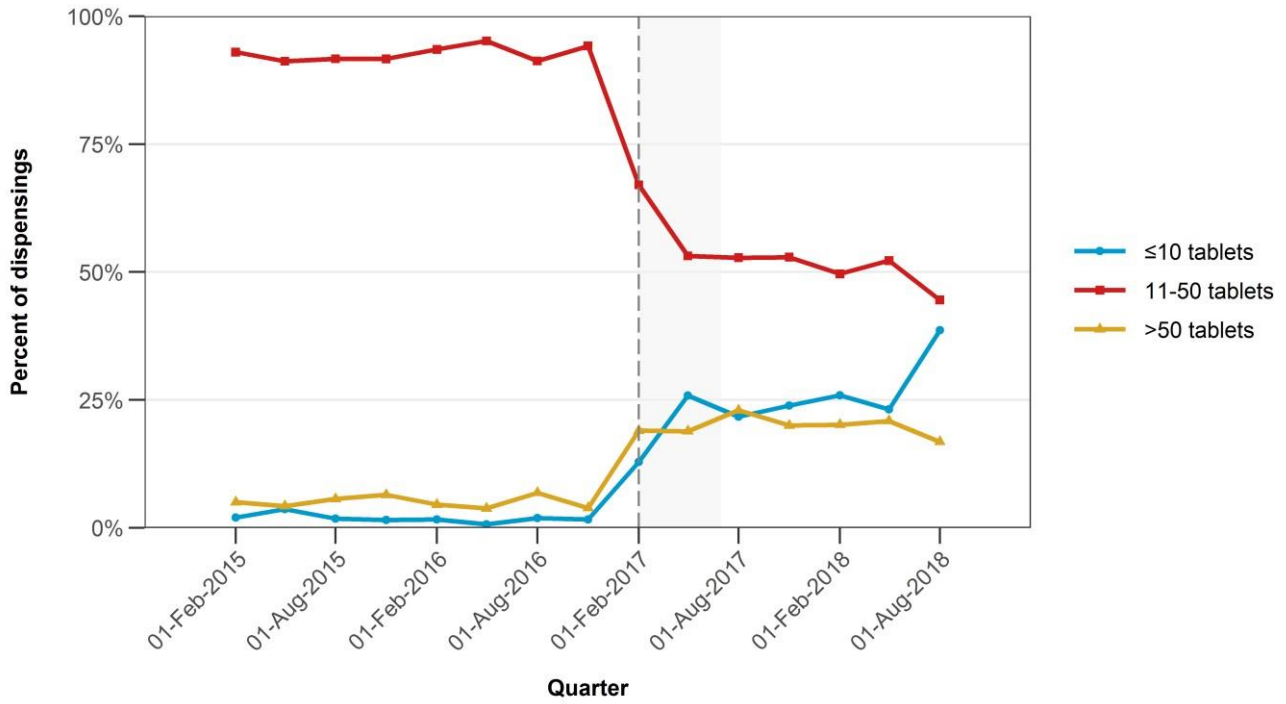

eFigure 4. Proportion of All Dispensings by Total Combined Strength of All Tablets Dispensed to People Initiating a New Treatment Episode By Quarter

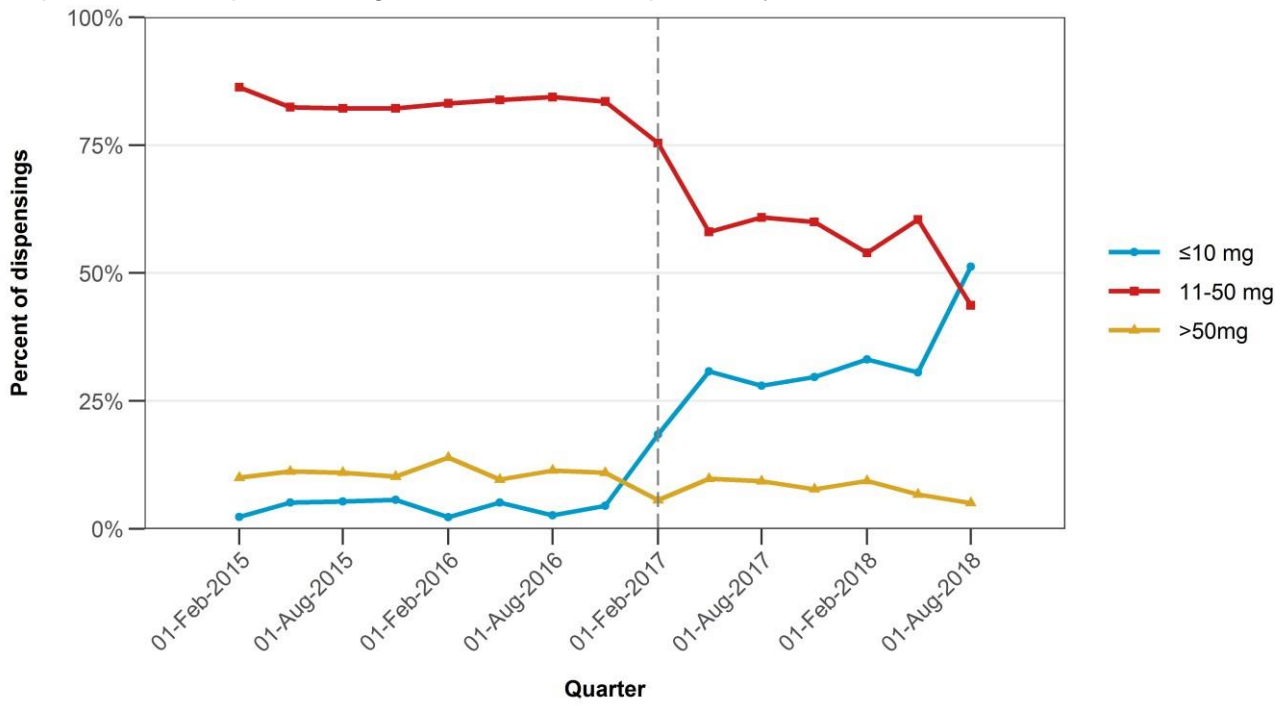

eFigure 5. Dispensing of Benzodiazepines by Month

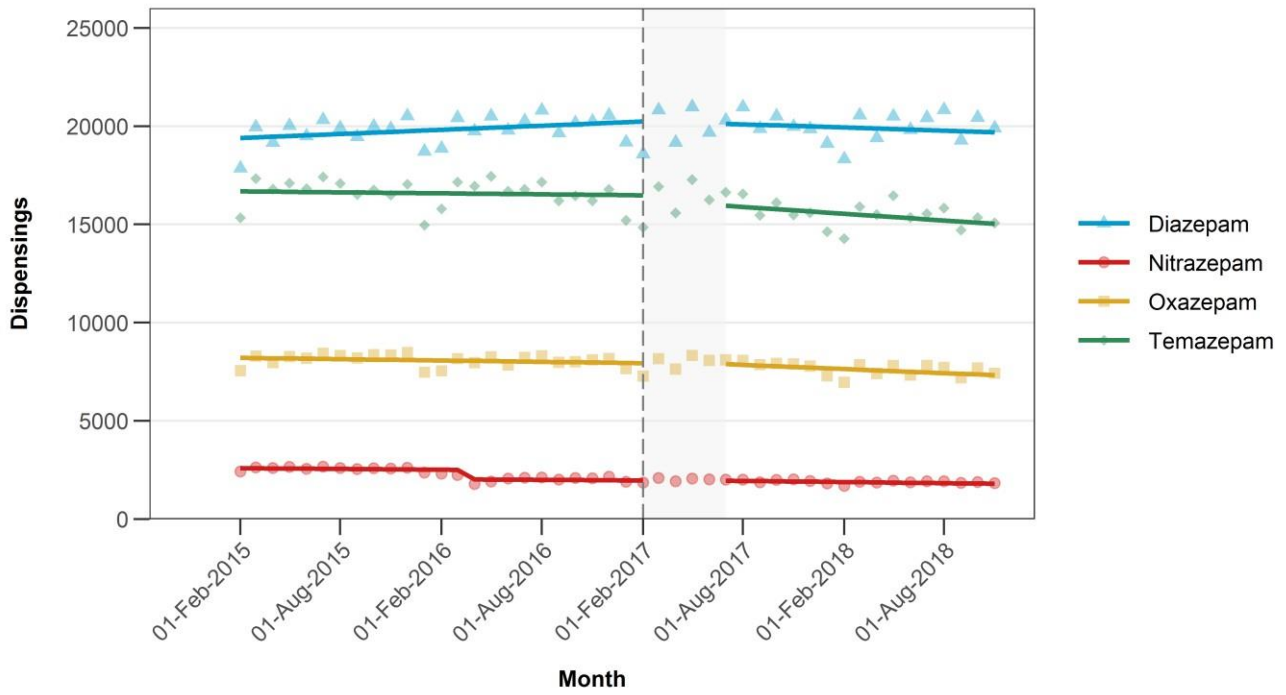

eTable 1. Change in Monthly Dispensings of Benzodiazepines After Changes to Alprazolam Subsidy Estimated Using Autoregressive Models

|                                         | <b>Diazepam</b> |               | <b>Nitrazepam</b> |               | <b>Oxazepam</b> |               | <b>Temazepam</b> |               |
|-----------------------------------------|-----------------|---------------|-------------------|---------------|-----------------|---------------|------------------|---------------|
|                                         | <b>Estimate</b> | <b>95% CI</b> | <b>Estimate</b>   | <b>95% CI</b> | <b>Estimate</b> | <b>95% CI</b> | <b>Estimate</b>  | <b>95% CI</b> |
| <b>Monthly baseline trend</b>           | 0.2%            | 0.1%, 0.3%    | -0.3%             | -0.8%, 0.3%   | -0.1%           | -0.2, -0.1%   | -0.1%            | -0.1%, 0.0%   |
| <b>Level shift after subsidy change</b> | -1.4%           | -3.5%, 0.6%   | 0.6%              | -7.4%, 9.3%   | 0.1%            | -1.5%, 1.6%   | -3.0%            | -4.5%, -1.5%  |
| <b>Change in monthly trend</b>          | -0.3%           | -0.5%, -0.2%  | -0.3%             | -1.1%, 0.6%   | -0.3%           | -0.4%, -0.2%  | -0.3%            | -0.4%, -0.2%  |

eFigure 6. All Prescribing Approvals Excluding Alprazolam by Month

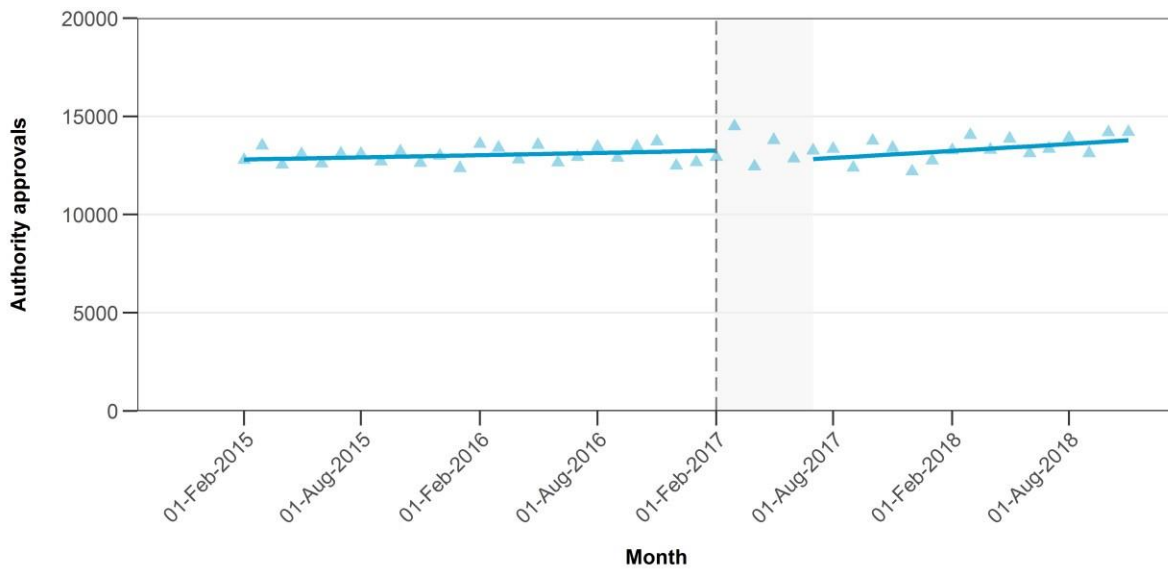



eTable 2. Change in Monthly Total Prescribing Approvals Excluding Alprazolam After Changes To Alprazolam Subsidy Estimated Using Autoregressive Models

| <b>Prescribing approvals, excluding alprazolam</b> |                 |               |
|----------------------------------------------------|-----------------|---------------|
|                                                    | <b>Estimate</b> | <b>95% CI</b> |
| <b>Monthly baseline trend</b>                      | 0.2%            | 0.1%, 0.3%    |
| <b>Level shift after subsidy change</b>            | -1.4%           | -3.5%, 0.6%   |
| <b>Change in monthly trend</b>                     | -0.3%           | -0.5%, -0.2%  |
